# Supplementary material for: RNA-seq analysis of short fiber mutants Ligon-lintless-1 (Li1) and – 2 (Li2) revealed important role of aquaporins in cotton (Gossypium hirsutum L.) fiber elongation
Source: PubMed Central journal article supplement (PMC4352256; doi:10.1186/s12870-015-0454-0), 2015-02-27

PIP: Gorai.005G254400

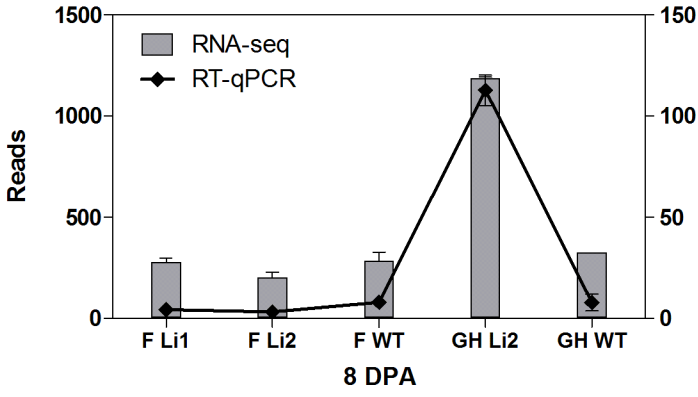

PIP: Gorai.007G100000

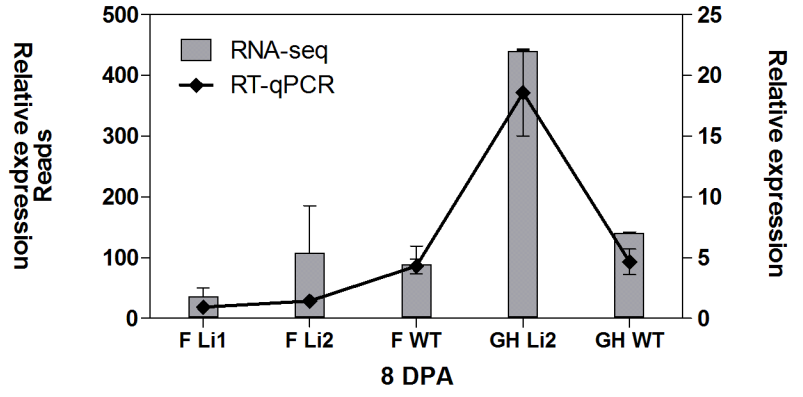

PIP: Gorai.008G033100

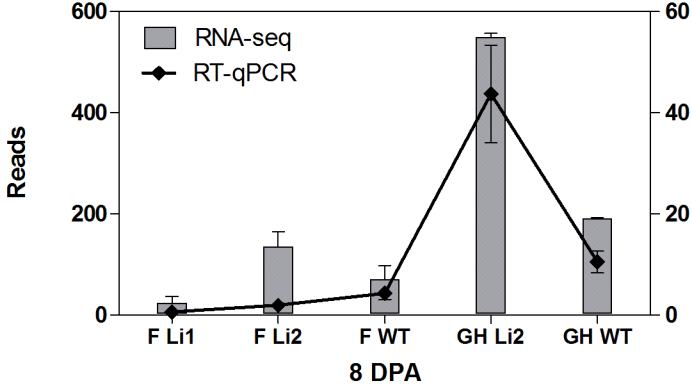

PIP: Gorai.009G418100

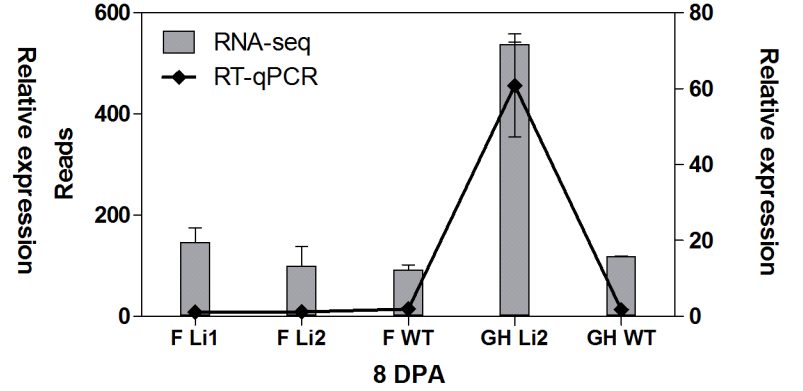

PIP: Gorai.010G198800

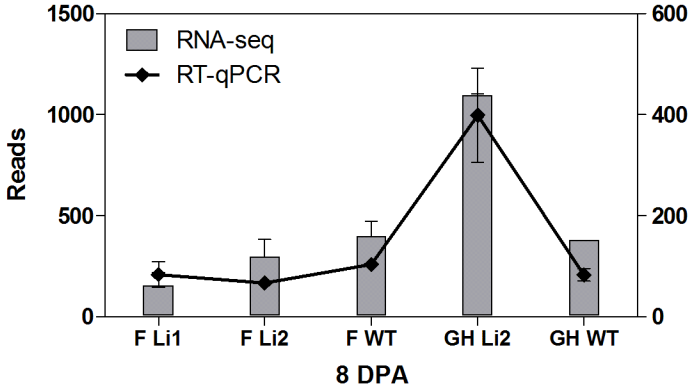

PIP: Gorai.011G239500

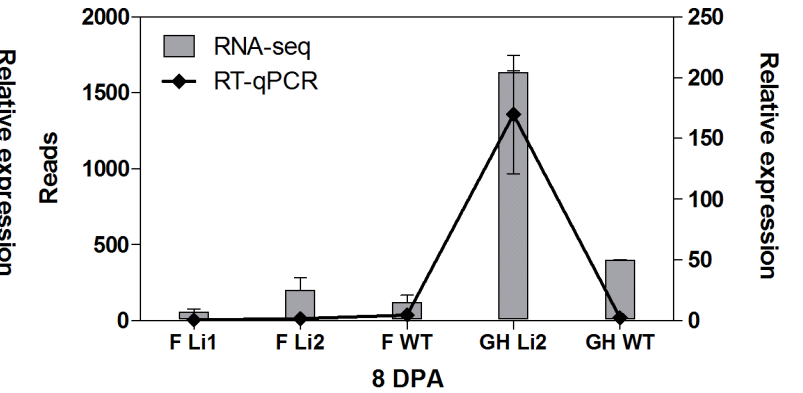

PIP: Gorai.006G166800

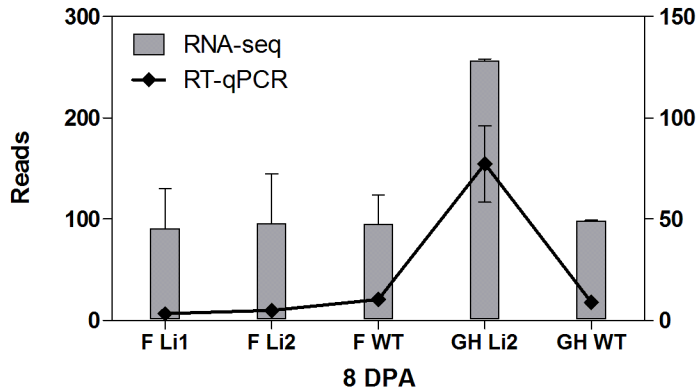

PIP: Gorai.011G253400

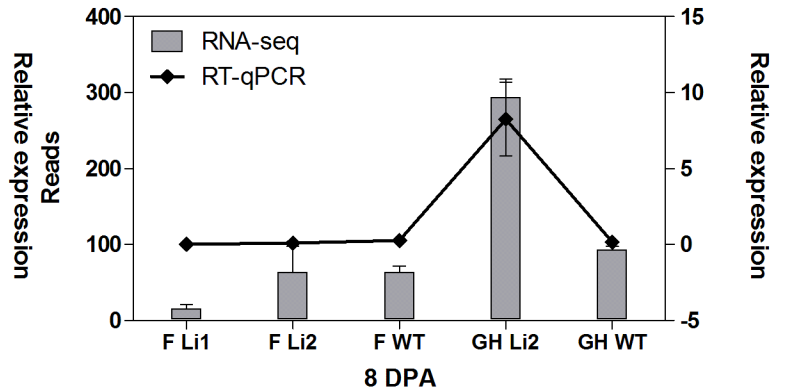

Supplement: 12870_2015_454_MOESM4_ESM.pdf [file 12870_2015_454_MOESM4_ESM.pdf]
